# Supplementary material
Source: Research Square preprint supplement (doi:10.21203/rs.3.rs-9612371/v1)
Supplement: Supplementary file 1 [file 7fa32a8dd72440b7c392d398.docx]

**Journal: Scientific Reports**

**Supplementary Information (SI)**

**Potential impact of small-scale SST structures on air-sea coupling in the Western Mediterranean**

**Camilo Melo-Aguilar1, and Gabriel Jordà2**

Corresponding authors:

C. Melo-Aguilar

[**cmelo@socib.es**](file:///Users/camilomelo/Library/CloudStorage/Dropbox/Paper_impact_SST/WorkingDocs/Final_submision_review/cmelo@socib.es)

G. Jordà

[**gabriel.jorda@ieo.csic.es**](mailto:gabriel.jorda@ieo.csic.es)

**1**Sistema de Observación y Predicción Costero de Las Illes Balears

**2**Centre Oceanogràfic de les Balears (Spanish Institute of Oceanography IEO-CSIC)

ORCID

**Camilo Melo-Aguilar:** 0000-0003-0060-1853

**Gabriel Jordà:**0000-0002-2782-8727

**Figures**

**SI1: spatial pattern correlation**

**
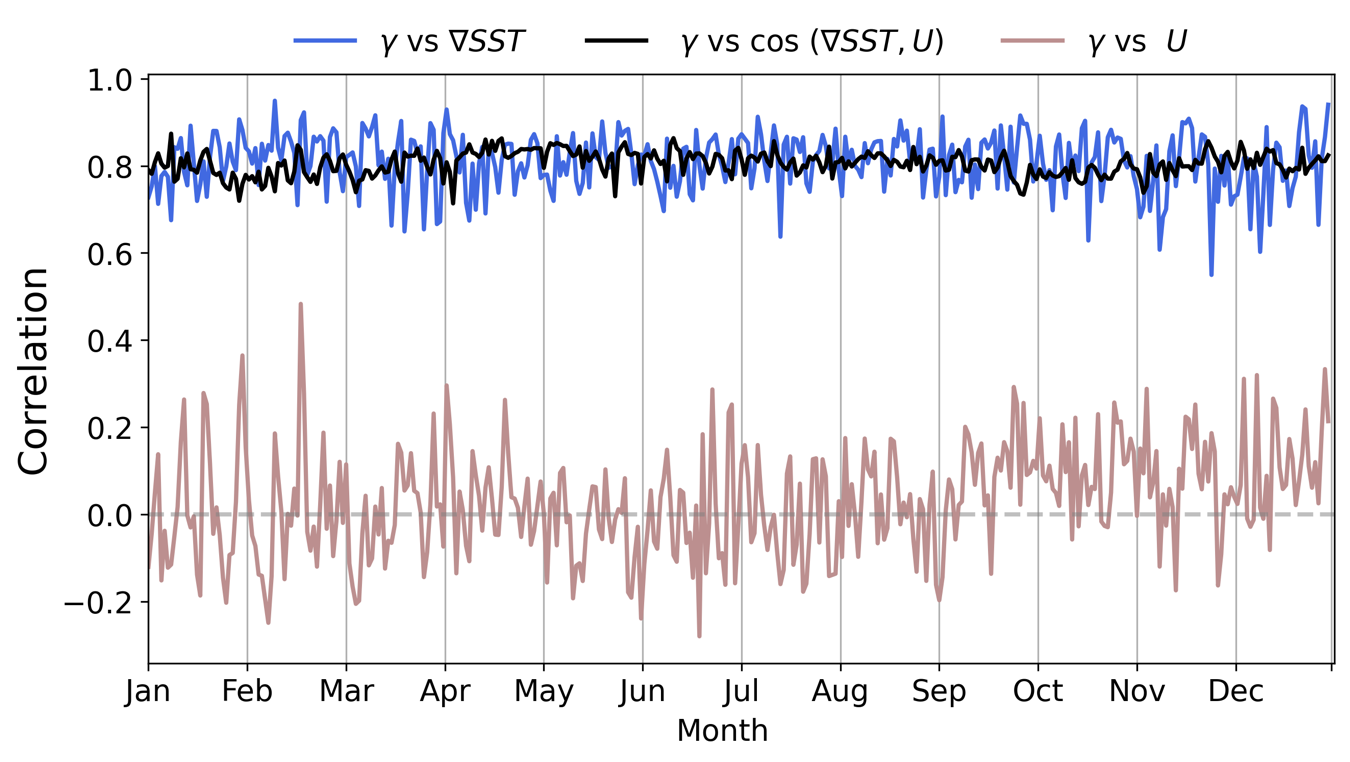
**

Figure S1 Time evolution of the spatial pattern correlation of 𝛾 vs SST gradient, cos(theta) and wind speed for the Ligurian Sea (6°–9° W, 41.5°–44° N). The results are shown for the year 2014 as an example, but similar results are obtained for other years.

**SI2: Seasonal 1% Percentile of 𝛾**


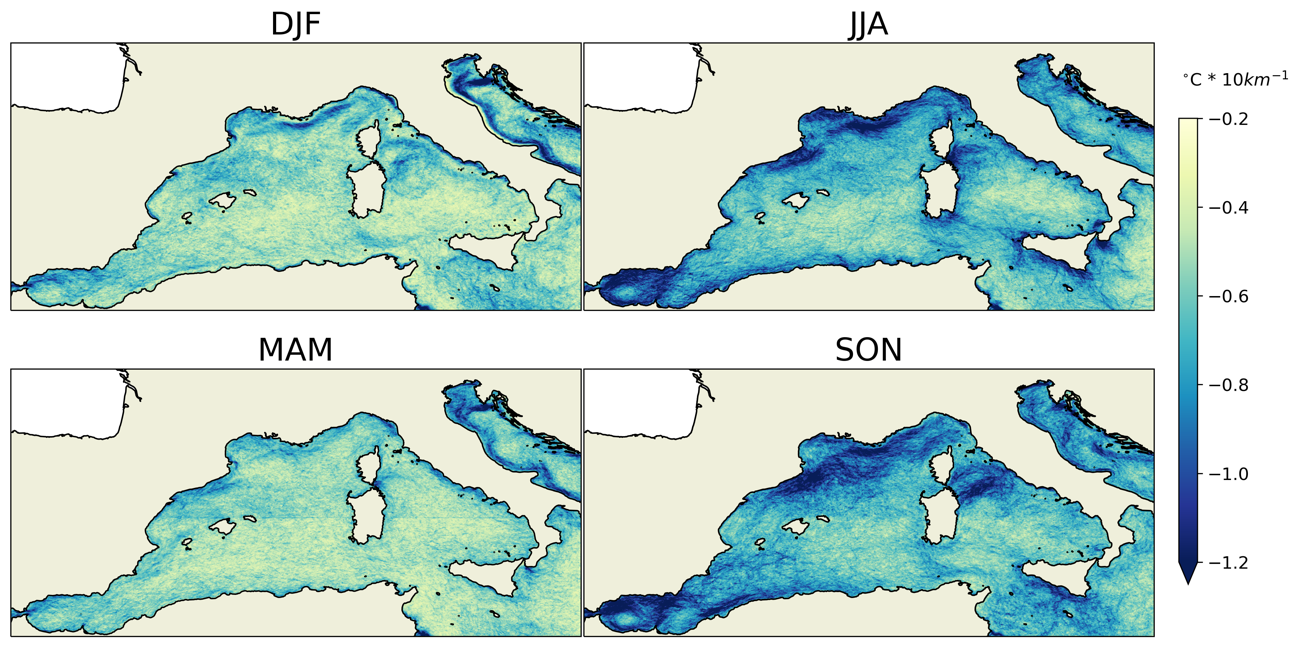


Figure S2 Seasonal 1% Percentile of 𝛾 for the period 2010-2019

**SI3: ensemble RMSE, std, and NSR for the JJA season**


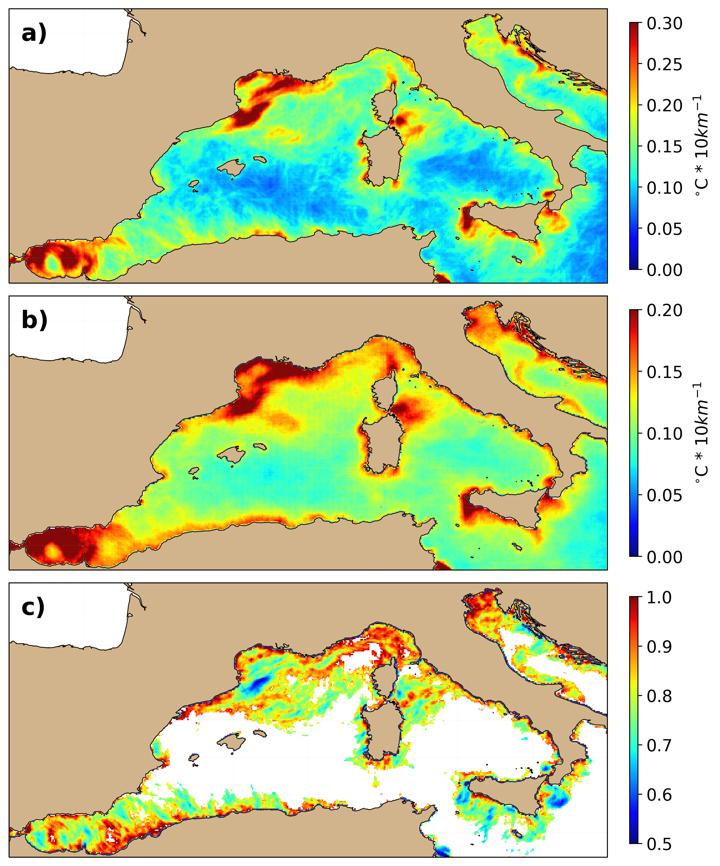


Figure S3 ensemble RMS (a), standard deviation (b) and noise-to-signal ratio (c) between 𝛾 obtained using different HRSST products for the JJA season (all products regridded to the OSTIA grid). In all cases the COSMO-REA6 winds are used for the estimation of 𝛾.

**SI34 ensemble RMSE, std, and NSR for the SON season**


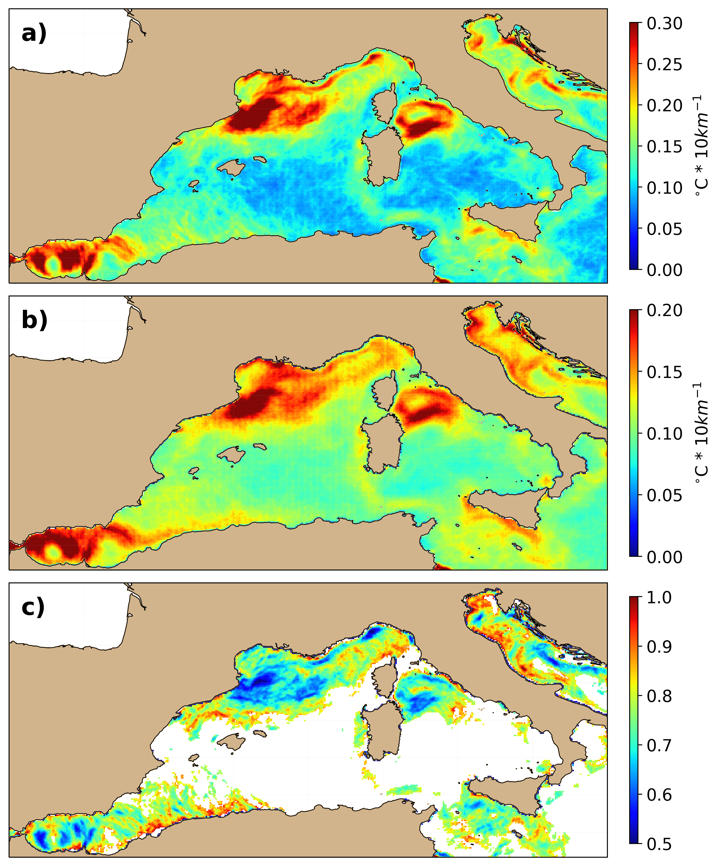


Figure S4 ensemble RMS (a), standard deviation (b) and noise-to-signal ratio (c) between 𝛾 obtained using different HRSST products for the SON season (all products regridded to the OSTIA grid). In all cases the COSMO-REA6 winds are used for the estimation of 𝛾.
